# Supplementary material for: New specimens of Baurutitan britoi and a taxonomic reassessment of the titanosaur dinosaur fauna (Sauropoda) from the Serra da Galga Formation (Late Cretaceous) of Brazil
Source: PeerJ journal article supplement (doi:10.7717/peerj.14333), 2022-11-15
Supplement: Photo-Video-Permission-Letter.pdf [file Photo-Video-Permission-Letter.pdf]

## PeerJ Permission Letter

All items (1-5) are required:

1. Title of PeerJ submission: **New specimens of Baurutitan britoi and a taxonomic reassessment of the titanosaur dinosaur fauna (Sauropoda) from the Serra da Galga Formation (Late Cretaceous) of Brazil**
2. Printed name of copyright holder: **Beethoven Teixeira**
3. Select copyrighted item: photographs | videos | other (please describe): **Scanned version of a newspaper article**
4. *For figures:* Supply the approved image(s) including the figure number(s) as they appear in the PeerJ submission OR A complete description of the image(s) : **Image 1.**

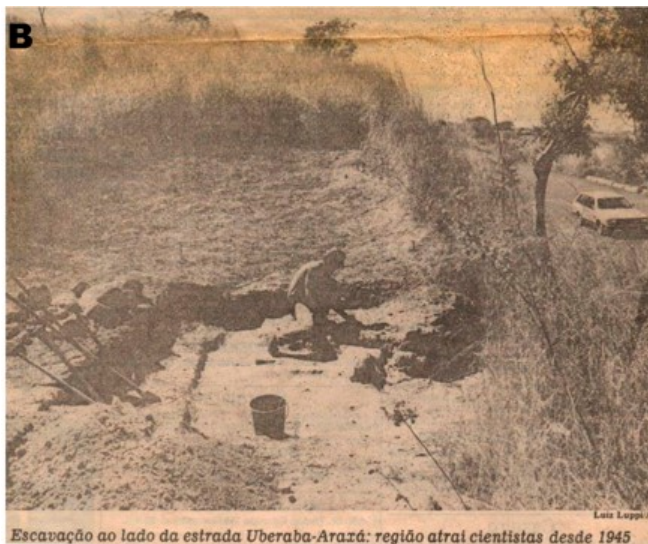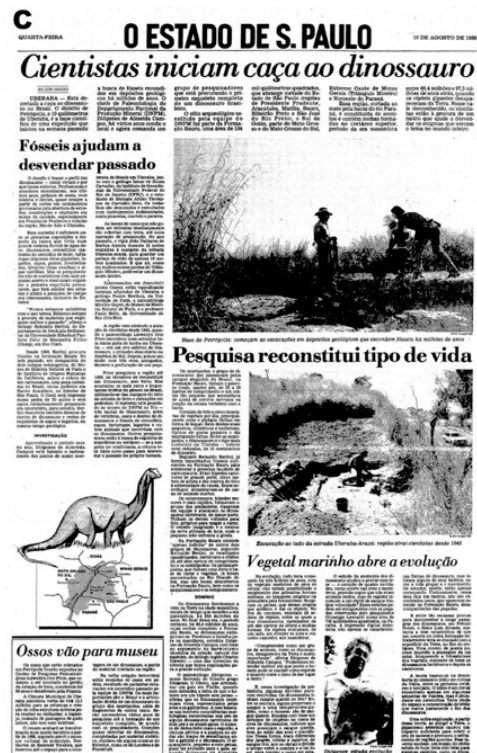

5. I give my permission to PeerJ to publish my work, as described and/or appear below, under the CC-BY 4.0 license.

  
Signature of copyright holder

October 4, 2019
